# Supplementary material for: Crystal engineering from a 1D chain to a 3D coordination polymer accompanied by a dramatic change in magnetic properties
Source: Royal Society of Chemistry journal article supplement (doi:10.1039/c2cc35879d), 2012-01-01
Supplement: c2cc35879d.pdf [file c2cc35879d.pdf]

## Supporting materials

Yu-Chun Chuang<sup>ab</sup>, Wei-Lun Ho<sup>a</sup>, Chou-Fu Sheu<sup>a</sup>, Gene-Hsiang Lee<sup>c</sup>, and Yu Wang<sup>\*a</sup>

<sup>a</sup> Department of Chemistry, National Taiwan University, Taipei, Taiwan

<sup>b</sup> National Synchrotron Radiation Research Center, Hsinchu, Taiwan

<sup>c</sup> Instrumentation Center, College of Science, National Taiwan University, Taipei, Taiwan

### A. Synthesis of 1D chain coordination polymer

A solution containing 0.249 g (1.5 mmol) of atrz dissolved in 15 mL of water and warmed to 60°C was added to a solution containing 0.128 g (0.5 mmol) of  $\text{Fe}(\text{BF}_4)_2 \cdot 6\text{H}_2\text{O}$  and a small amount of ascorbic acid dissolved in 15 mL of water. Yellow crystals were obtained by slow evaporation at room temperature within one day. Anal. Calcd for  $\text{C}_{12}\text{H}_{24}\text{N}_{24}\text{B}_2\text{F}_8\text{O}_6\text{Fe}$ : C, 17.34; H, 2.91; N, 40.48. Found: C, 17.10; H, 2.88; N, 40.57.

### B. Structural information of 1D chain coordination polymer

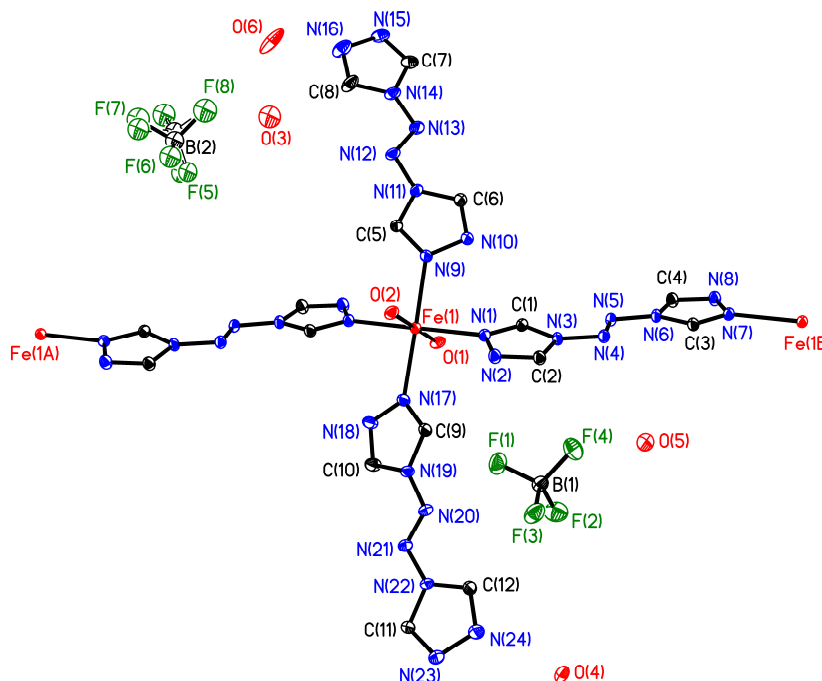

Figure S1. Molecular structure of  $[\text{Fe}(\mu\text{-atrz})(\text{atrz})_2(\text{H}_2\text{O})_2](\text{BF}_4)_2 \cdot 4\text{H}_2\text{O}$  at 150 K, ellipsoids are drawn with 30 % probability. Hydrogen atoms are omitted.

Table S1. Crystallographic detail of  $[\text{Fe}(\mu\text{-atrz})(\text{atrz})_2(\text{H}_2\text{O})_2](\text{BF}_4)_2 \cdot 4\text{H}_2\text{O}$

|                                                    |                                                                                |
|----------------------------------------------------|--------------------------------------------------------------------------------|
| Temperature                                        | 150 K                                                                          |
| Formula                                            | $\text{C}_{12}\text{H}_{22}\text{B}_2\text{F}_8\text{FeN}_{24}\text{O}_{5.32}$ |
| Formula weight                                     | 817.14                                                                         |
| Crystal system                                     | Triclinic                                                                      |
| Space group                                        | $P\bar{1}$                                                                     |
| $a$ (Å)                                            | 11.2939(2)                                                                     |
| $b$ (Å)                                            | 11.4812(2)                                                                     |
| $c$ (Å)                                            | 13.0931(2)                                                                     |
| $\alpha$ (deg)                                     | 112.1212(9)                                                                    |
| $\beta$ (deg)                                      | 95.5478(11)                                                                    |
| $\gamma$ (deg)                                     | 91.2584(11)                                                                    |
| $V$ (Å <sup>3</sup> )                              | 1562.27(5)                                                                     |
| $Z$                                                | 2                                                                              |
| $D_{\text{calc}}$ (g/cm <sup>3</sup> )             | 1.737                                                                          |
| $\mu$ (mm <sup>-1</sup> )                          | 0.603                                                                          |
| Crystal size                                       | 0.20 x 0.15 x 0.08                                                             |
| $F(000)$                                           | 825                                                                            |
| Reflections collected                              | 32512                                                                          |
| Unique reflections/ observed. ( $I > 2\sigma(I)$ ) | 7169/4498                                                                      |
| Max and min transmission                           | 0.95, 0.89                                                                     |
| $R_1, wR_2^a$ ( $I > 2\sigma(I)$ )                 | 0.0599, 0.1542                                                                 |
| $R_1, wR_2^a$ (all data)                           | 0.1070, 0.1750                                                                 |
| Goodness of fit on $F^2$                           | 1.070                                                                          |
| Parameters / restraints                            | 464 / 20                                                                       |
| Largest diff. peak and hole                        | 1.055 and -0.860 e.Å <sup>-3</sup>                                             |

$$R_F = \Sigma ||F_o - F_c|| / \Sigma |F_o|; R_w(F^2) = [\Sigma w|F_o^2 - F_c^2|^2 / \Sigma w(F_o^4)]^{1/2}$$

Table S2. Selected bond lengths (Å) and angles (deg) of  $[\text{Fe}(\mu\text{-atrz})(\text{atrz})_2(\text{H}_2\text{O})_2](\text{BF}_4)_2 \cdot 4\text{H}_2\text{O}$  and torsion angle of atrz ligand

| Bond             | Distance (Å) |
|------------------|--------------|
| Fe(1)–O(1)       | 2.053(2)     |
| Fe(1)–O(2)       | 2.070(3)     |
| Fe(1)–N(1)       | 2.195(3)     |
| Fe(1)–N(7)       | 2.206(3)     |
| Fe(1)–N(9)       | 2.207(3)     |
| Fe(1)–N(17)      | 2.218(3)     |
| Angle            | Degree (°)   |
| O(1)–Fe(1)–O(2)  | 179.42(10)   |
| N(1)–Fe(1)–N(9)  | 91.02(11)    |
| N(9)–Fe(1)–N(7)  | 88.36(11)    |
| N(1)–Fe(1)–N(17) | 90.40(11)    |
| N(7)–Fe(1)–N(17) | 90.20(11)    |
| O(1)–Fe(1)–N(1)  | 89.14(11)    |
| O(2)–Fe(1)–N(1)  | 90.89(11)    |
| O(1)–Fe(1)–N(7)  | 89.97(11)    |

|                           |            |
|---------------------------|------------|
| O(2)-Fe(1)-N(7)           | 90.01(10)  |
| O(1)-Fe(1)-N(9)           | 90.27(11)  |
| O(2)-Fe(1)-N(9)           | 90.30(11)  |
| O(1)-Fe(1)-N(17)          | 88.52(11)  |
| O(2)-Fe(1)-N(17)          | 90.91(11)  |
| <br>                      |            |
| Torsion angle             | Degree (°) |
| N(1)-N(2)···N(7)-N(8)     | 6.7 (3)    |
| N(9)-N(10)···N(15)-N(16)  | 9.5 (3)    |
| N(17)-N(18)···N(23)-N(24) | 16.0 (3)   |

---

#### C. Synchrotron powder X-ray diffraction pattern measurement

The PXRD measurements were performed at beamline BL01C in NSRRC. The in-situ powder diffraction data were recorded on a Mar3450 image plate at the wavelength of 0.97946 Å, where two theta angle is calibrated based on the standard powder sample of CeO<sub>2</sub>.

#### D. Magnetic measurement

The temperature dependent magnetic susceptibility was measured in RSO mode using the Quantum Design MPMS SQUID magnetometer under an applied magnetic field of 2000 Oe.

#### E. Thermogravimetric analyses (TGA) of 1D chain coordination polymer

A TGA measurement was taken in the range of (a) 25-150°C at a heating rate of 1°C/min; (b) 150-350°C at a heating rate of 5°C/min. The sample weight is 9.832 mg. The water content of the title compound established from the thermogravimetric analysis is ~ 5.7, which includes water molecules in coordination and in the lattice. The first weight loss should be related to the loss of water molecules in the lattice; and the second drop should attribute to the coordinated water molecules with a ratio of 4:2. However the steps are not that clearly separated, the total loss corresponds to ~ 5.7 water molecules. It is worth noticing that the water molecules in lattice are strongly H-bonded to the coordinated water molecules which may explain the two steps are not clearly separated. Furthermore, sample starts to loose water even at room temperature. It is clear that the sample is completely anhydrous beyond 100°C.

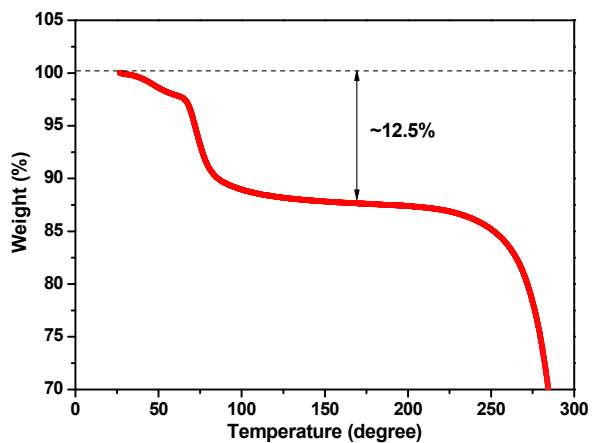

Figure S2. TGA analysis of  $[\text{Fe}(\mu\text{-atrz})(\text{atrz})_2(\text{H}_2\text{O})_2](\text{BF}_4)_2 \cdot 4\text{H}_2\text{O}$ ; calculated water content should be 13.0%.
